# Supplementary material for: Prodromal dysfunction of α5GABA-A receptor modulated hippocampal ripples occurs prior to neurodegeneration in the TgF344-AD rat model of Alzheimer's disease
Source: PubMed Central journal article supplement — Heliyon. 2021 Sep 1;7(9):e07895. doi: 10.1016/j.heliyon.2021.e07895 (PMC8449175; doi:10.1016/j.heliyon.2021.e07895), 2021-09-01
Supplement: mmc1.pdf [file mmc1.pdf]

## Supplementary Methods and Extended Data for

### Title: Prodromal dysfunction of $\alpha$ 5GABA-A receptor modulated hippocampal ripples in the TgF344-AD Rat Model of Alzheimer's disease

This section includes:

Methods

Supplementary data

Figs. S1 to S19

Table S1 to S16

#### SUPPLEMENTAL FIGURES FOR METHODS SECTION

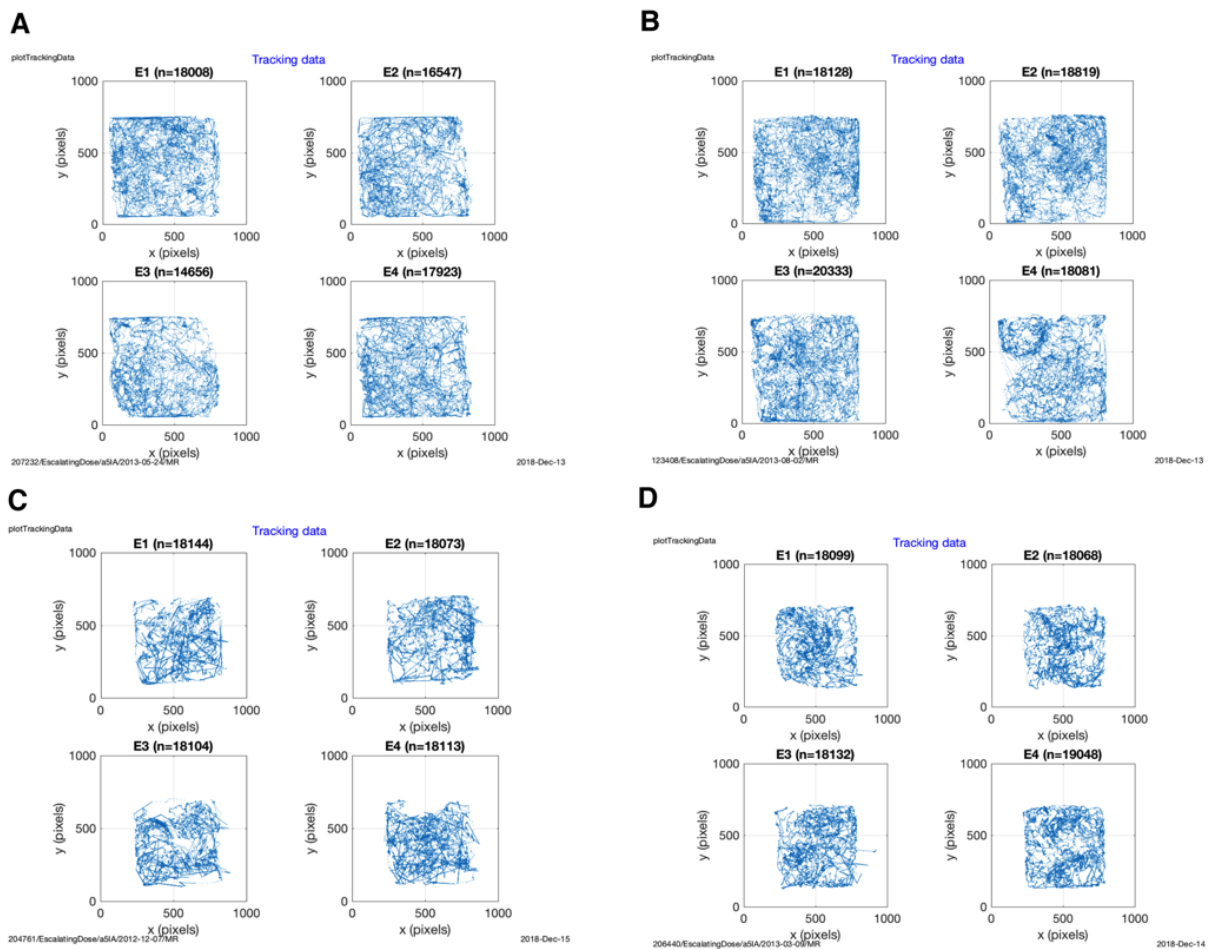

Fig S1: Trajectories of Long Evans Adult Male Rats During Escalating Dose Model.

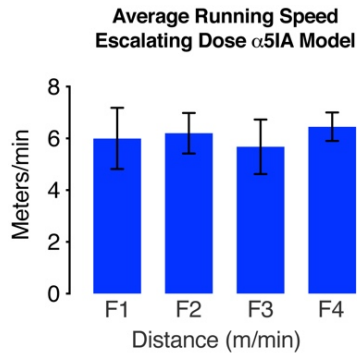

**Fig S2:** Histogram showing average running speeds of for all rats during escalating dose experiment. Freidman’s ANOVA revealed no significant differences in running speed across test sessions.

**Table S1:** Average running speed of each rat during each session of escalating dose experiment.

| Rat Number | F1  | F2  | F3  | F4  |
|------------|-----|-----|-----|-----|
| Rat 123408 | 3.7 | 5   | 3.4 | 5.9 |
| Rat 204761 | 5.3 | 5.8 | 5.3 | 5.9 |
| Rat 206440 | 5.7 | 5.5 | 5.5 | 5.9 |

**A.**

**Trajectories for F344 Rats in Remapping Model**

**Subject 1**

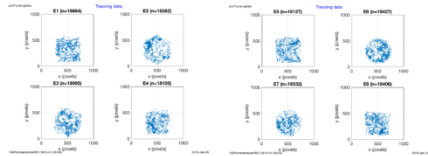

**Subject 2**

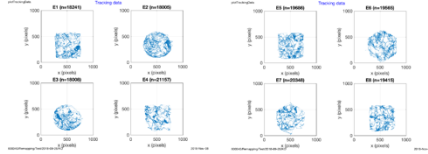

**Subject 3**

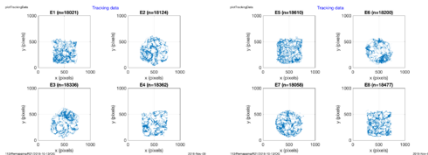

**B.**

**Representative Trajectories and Unsmoothed Place Fields**

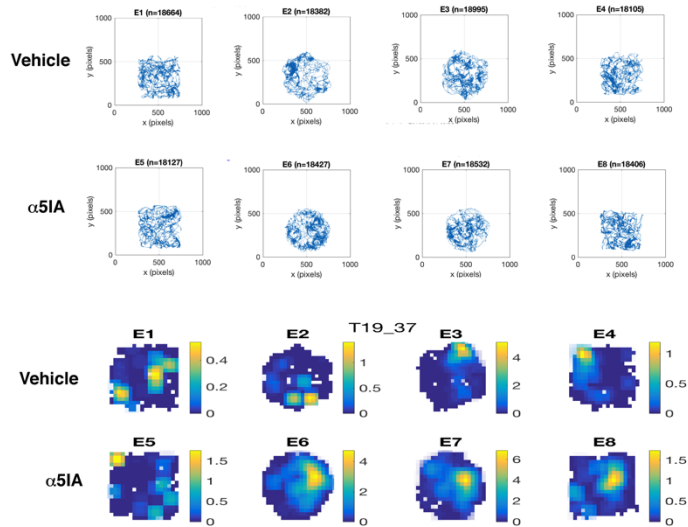

**Fig S3.** Trajectories **A)** Representative trajectories of F344 male rats during place cell place field remapping experiment. **B)** Representative path trajectories (top) and unsmoothed place fields (bottom) from a remapping experiment in a WT F344 rat (subject 1) showing increased firing rates (rate remapping) due to novelty under vehicle control conditions and following oral administration of  $\alpha 5IA$  (1.0mg/kg). Figure also shows that the overall mean firing rate is also higher following  $\alpha 5IA$  administration in both environments as compared with vehicle.

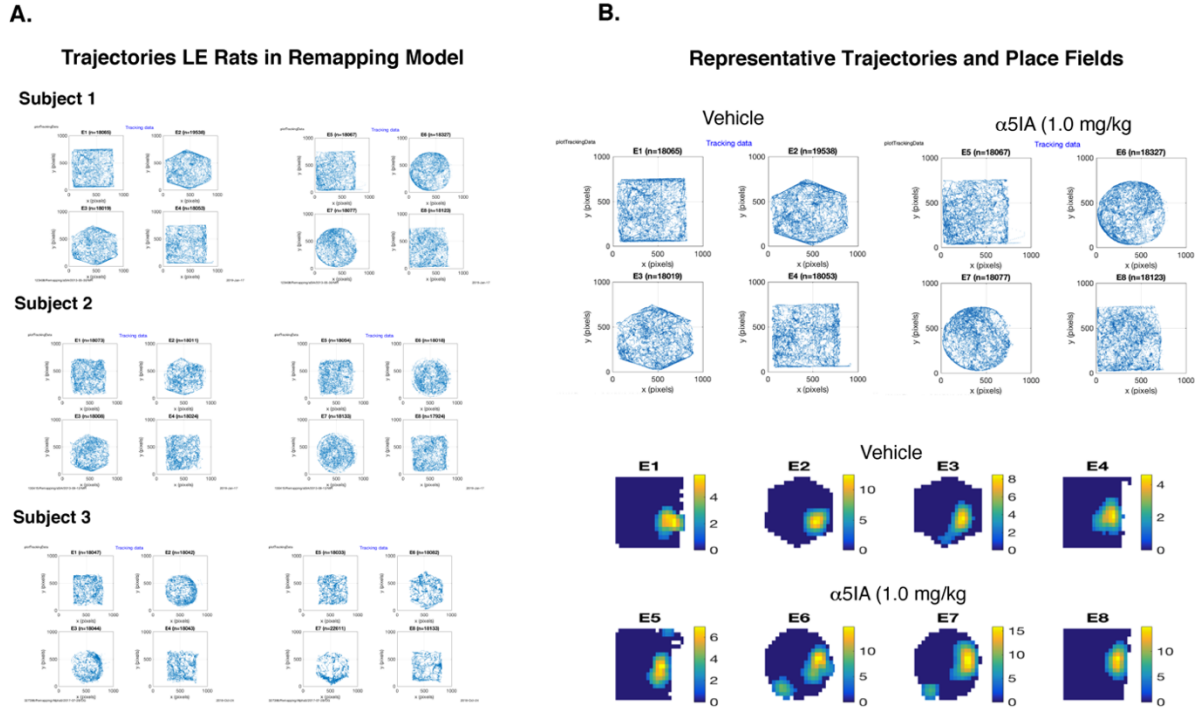

**Fig.**

**FigS4: Trajectories A)** Trajectories from LE male rats during place cell remapping model. **B)** Representative trajectories (top) and unsmoothed place fields (bottom) from Subject 1 showing characteristic increases in firing rates due to novelty and oral  $\alpha$ 5IA (1.0mg/kg) administration.

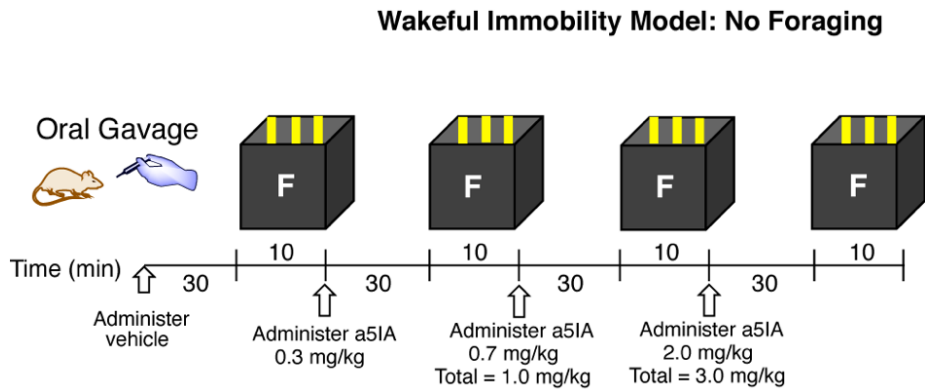

**Fig. S5. Detection of CA1 ripples. A)** Schematic diagram of LFP recordings for analysis of vehicle and drug effects of ripples. Data was acquired from immobile awake animals placed in a familiar environment. Food was withheld to discourage foraging behavior during the 10 min recording sessions.

**Table S2. Ages of Strains of Rats Used in Escalating Dose Experiments for Probe Drug effects on Ripples**

| Subject/Rat #     | Strain | Age at testing |
|-------------------|--------|----------------|
| Subject 1/#327396 | LE     | 15             |
| Subject 2/#130    | F344   | 9              |
| Subject 3/#600040 | F344   | 16             |
| Subject 4/#142    | F344   | 18             |

|                 |           |    |
|-----------------|-----------|----|
| Subject 5/#113  | F344      | 12 |
| Subject 6/#115  | TgF344-AD | 12 |
| Subject 7/#128  | TgF344-AD | 9  |
| Subject 8/#822  | TgF344-AD | 11 |
| Subject 9/#811  | F344      | 11 |
| Subject 10/#814 | F344      | 11 |

### Representative Trajectory and Theta/Delta Ratios

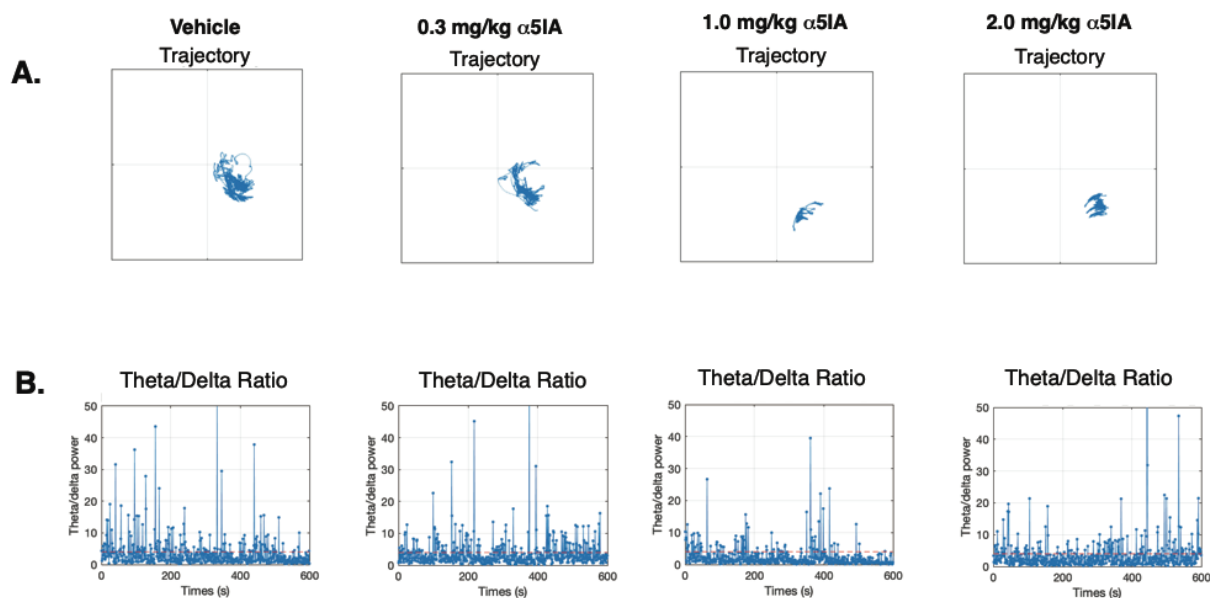

**Fig. S6: Representative trajectories and theta/delta power ratio.** All data shown are from Rat #2 (9 mo old F344 male). Panel A shows trajectories and panel shows corresponding theta/delta power ratios during serial exposures to the familiar environment in the escalating dose model.

**Table S3: Percentage of Time Spent Immobile During Test Sessions**

| Rat/Drug/Dose/Model          | Percent Time Immobile |
|------------------------------|-----------------------|
| LEM_Subject-1_Veh_FFFF       | 49.003                |
| LEM_Subject-1_α5IA_0.3_FFFF  | 50.332                |
| LEM_Subject-1_α5IA_1.0_FFFF  | 50.831                |
| LEM_Subject-1_α5IA_3.0_FFFF  | 43.76                 |
| F344_Subject-2_Veh_FFFF      | 77.434                |
| F344_Subject-2_α5IA_0.3_FFFF | 74.799                |
| F344_Subject-2_α5IA_1.0_FFFF | 85.578                |
| F344_Subject-2_α5IA_2.0_FFFF | 77.449                |
| F344_Subject-3_Veh_FFFF      | 84.242                |
| F344_Subject-3_α5IA_0.3_FFFF | 83.233                |
| F344_Subject-3_α5IA_1.0_FFFF | 94.591                |
| F344_Subject-3_α5IA_2.0_FFFF | 89.583                |

|                              |        |
|------------------------------|--------|
| F344_Subject-4_Veh_FFFF      | 85.548 |
| F344_Subject-4_α5IA_0.3_FFFF | 84.653 |
| F344_Subject-4_α5IA_1.0_FFFF | 87.725 |
| F344_Subject-4_α5IA_2.0_FFFF | 83.845 |

### Relationship Between Ripples and Multi-Unit Activity

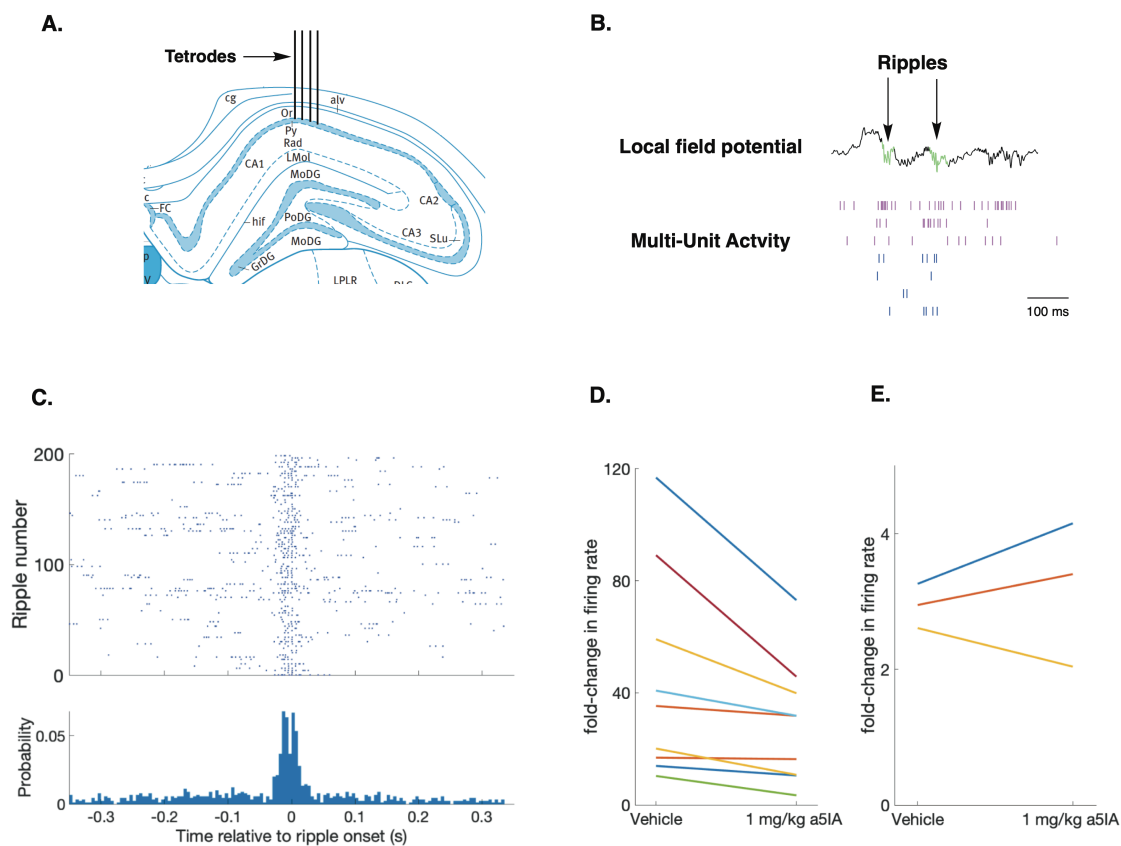

**Fig S7: Single unit firing times relative to the onset time of ripples.** **A)** Schematic drawing of representative recording sites in the hippocampal CA1 subregion. **B)** Representative multiunit activity during ripples. **C)** Ripple-triggered raster plot (top) and firing probability histogram (lower) for a representative CA1 pyramidal cell. Fold-change in ripple-associated firing rate with and without α5IA for **(D)** pyramidal cells and **(E)** interneurons recorded with electrode best located within the pyramidal cell layer.

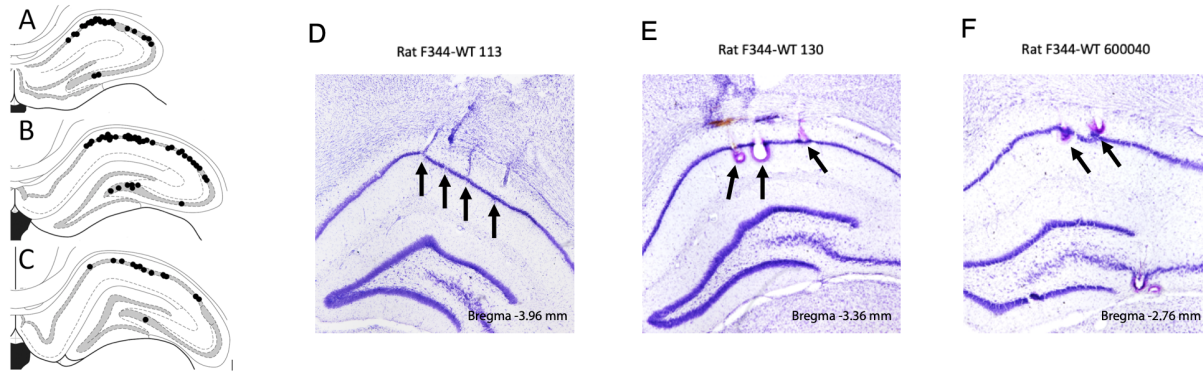

**Fig. S8. Histological verification of recording locations.** A) Illustration of coronal sections that are in the anterior-posterior plane at -2.5 mm (A), -3.4 mm (B), and -3.8 mm (C) from Bregma for rats used in place field remapping studies. Black dots indicate tetrode locations. Majority of tetrodes were located in CA1 and those that were located elsewhere were excluded from analyses. (D, E, F) Photographic images of coronal sections showing examples of tetrode locations in CA1 subregion for three F344 male adult rats used for ripple analysis.

**Table S4: A $\beta$ 42 and A $\beta$ 40 Plasma Concentrations in Males and Females.**

**A $\beta$ 42**

| Multiple comparisons test | Adjusted P Value |
|---------------------------|------------------|
| TgF344-AD 3M v. 3F        | >0.9999          |
| TgF344-AD 6M v. 6F        | >0.9999          |
| TgF344-AD 9M vs. 9F       | >0.9999          |
| TgF344-AD 12M v. 12F      | >0.9999          |

**A $\beta$ 40**

|                      |         |
|----------------------|---------|
| WT F344 3M v. WT3F   | >0.9999 |
| WT F344 6M v. WT6F   | 0.8370  |
| WT F344 12M v. WT12F | 0.3586  |

**Table S5: Results of One-Way Wilcoxon Test for Object Validation and Evaluation for Intrinsic Bias**

| <u>One-Way Wilcoxon Test</u>     | <u>Object 1</u> | <u>Object 2</u> | <u>Object 3</u> | <u>Object 4</u> | <u>All Objects</u> |
|----------------------------------|-----------------|-----------------|-----------------|-----------------|--------------------|
| Theoretical median               | 50.00           | 50.00           | 50.00           | 50.00           | 50.00              |
| Actual median                    | 35.80           | 55.66           | 39.99           | 82.04           | 39.15              |
| Number of values                 | 12              | 6               | 4               | 6               | 34                 |
| Sum of signed ranks (W)          | -14.00          | 9.000           | -4.000          | 15.00           | -165.0             |
| Sum of positive ranks            | 32.00           | 15.00           | 3.000           | 18.00           | 215.0              |
| Sum of negative ranks            | -46.00          | -6.000          | -7.000          | -3.000          | -380.0             |
| <b>P value (two tailed)</b>      | <b>0.6221</b>   | <b>0.4375</b>   | <b>0.6250</b>   | <b>0.1562</b>   | <b>0.1629</b>      |
| Exact or estimate?               | Exact           | Exact           | Exact           | Exact           | Exact              |
| <b>P value summary</b>           | <b>ns</b>       | <b>ns</b>       | <b>ns</b>       | <b>ns</b>       | <b>ns</b>          |
| <b>Significant (alpha=0.05)?</b> | <b>No</b>       | <b>No</b>       | <b>No</b>       | <b>No</b>       | <b>No</b>          |

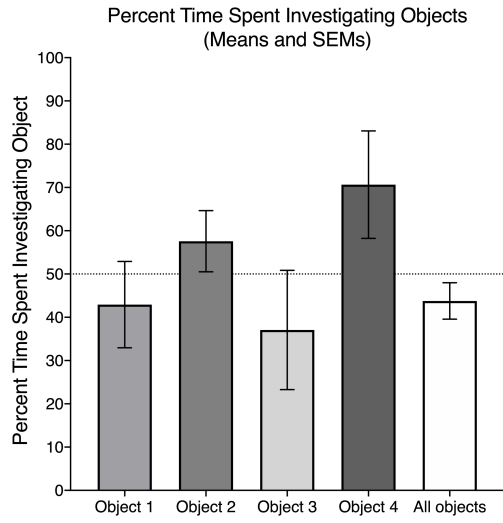

**Fig S9:** Histogram showing Means and SEMs for percent time spent investigating the different types of objects as compare to chance.

## SUPPLEMENTAL RESULTS

### *Analysis of Mean Firing Rates of LE Rat Place Cells in Escalating Dose Model*

The firing rates of LE rat CA1 pyramidal cells were measured while animals explored the familiar environment following administration of vehicle and escalating doses of  $\alpha$ 5IA. The average percent change in mean firing rate ranged from 23 to 71% with an average change of 38% following administration of the 1.0 mg/kg dose of  $\alpha$ 5IA (**Table S5**). The effect of vehicle versus  $\alpha$ 5IA on the activity of individual cells in the scatter plots and frequency distributions (**Fig S10**).

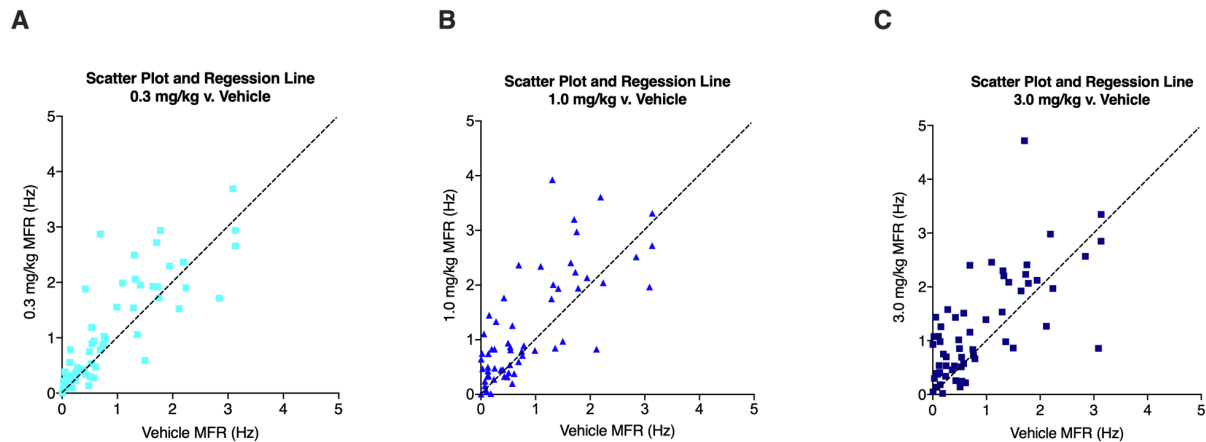

**Fig. S10. Scatter Plots for Mean Firing Rates in Escalating Dose Model.** **A)** Scatter plot for vehicle fit curve line versus 0.3 mg/kg dose of  $\alpha$ 5IA. **B)** Scatter plot for vehicle versus 1.0 mg/kg. **C)** Scatter plot for vehicle versus 3.0 mg/kg.

**Table S6: Mean Firing Rates of Individual LE Rats Escalating Dose Model**

| Rat #   | Vehicle    | 0.3 mg/kg  | 1.0 mg/kg         | 3.0 mg/kg  | % Change<br>(1.0 mg/kg) |
|---------|------------|------------|-------------------|------------|-------------------------|
| 204761  | 1.08665905 | 1.22439015 | <b>1.34093528</b> | 1.48529932 | 23%                     |
| 206440  | 0.74717198 | 0.95881221 | <b>1.27890491</b> | 1.17652844 | 71%                     |
| 207232  | 0.96529718 | 1.40989799 | <b>1.28803643</b> | 1.31341157 | 33%                     |
| 123408  | 0.46385454 | 0.60343560 | <b>0.61672310</b> | 0.58985254 | 33%                     |
| Average | 0.81574568 | 1.04913398 | <b>1.13114993</b> | 1.14127296 | <b>38%</b>              |

### *Supplemental Results from Remapping Model Analyses*

Oral  $\alpha$ 5IA administration significantly increased the mean, peak and in-field mean firing rates (MFR) of CA1 place cells in this remapping model in the LE Rats (Rats n= 3; Place cells n = 115). Planned comparisons indicated that  $\alpha$ 5IA administration significantly increased MFRs in the familiar environment ( $p < 0.01$ ) (**Fig. S11-A and S12; Tables S7, S8 and S9**). The increase MFR of CA1 place cells seen in the LE rats is consistent with that observed in the F344 rats (**see Fig. 3 in manuscript**). Planned comparisons also revealed



significant increases in MFR on exposure to environmental novelty in the vehicle conditions indicating an effect of environment on mean firing rates as observed in WT F344 rats (**Fig. S11-A; Table S9**). These effects of drug and environment were significant after adjusting the alpha for multiple comparisons. The interaction between drug and environment was not significant on this parameter. Peak firing rates (PFR) also increased significantly in the familiar environment following  $\alpha$ 5IA administration ( $p < 0.01$ ). (**Fig. S11-B; Table S9**) Planned comparisons also revealed significant increases in PFR during exposure to environmental novelty in the vehicle ( $p < 0.05$ ). Although this was not significant after controlling for multiple comparisons it is important to note that this control experiment was not influenced by subsequent experiments in the drug conditions (**Fig. S11-B; Table S9**). The interaction between drug and environment was not significant on this parameter. Significant in-field MFRs changes are also seen in this model. (**Fig. S11-C; Table S9**) Planned comparisons revealed a significant in-field MFR increase in the familiar environment following  $\alpha$ 5IA administration. Planned comparisons indicated that in-field MFRs also increased significantly in the novel environment under both the vehicle indicating an effect of environment on this parameter. The effect of novelty on this parameter in the drug condition was significant after controlling for multiple comparisons. The interaction between drug and environment was not significant on this parameter.

Analysis of variance for SIC per spike revealed significant effects. (**Fig. S11-D; Table S9**) Planned comparisons demonstrated significant decreases in SIC in the novel environment in the vehicle and drug treatment conditions. The interaction between drug and environment was not significant on this parameter.

Significant changes in place field area (PFA) were revealed by ANOVA as well. (**Fig. S11-E; Table S9**) PFA increased with environmental novelty from  $366\text{cm}^2$  to  $407\text{cm}^2$  (11%) and  $368\text{cm}^2$  to  $412\text{cm}^2$  (12%) in the vehicle and drug conditions respectively but, although there was a strong trend ( $p = 0.07$ ) observed in vehicle condition the increase in PFA only reached statistical significance ( $p = 0.001$ ) in the drug condition. The interaction between drug and environment was not significant on this parameter.

Analysis of variance also revealed significant differences in place field spatial correlations in the vehicle condition. (**Fig. S11-F; Table S9**) Pairwise comparisons indicated spatial correlations between first familiar and each of the two novels were significantly lower than the correlations between the two familiars indicating remapping occurred during both exposures to the novel in the vehicle condition. This effect remained significant when controlling for multiple comparisons. Significant differences in spatial correlations were also revealed by ANOVA in the drug condition. Pairwise comparisons indicated spatial correlations between first familiar and each of the two novels were significantly lower than the correlations between the two familiars indicating remapping occurred during both exposures to the novel in the drug condition as well. Comparisons of spatial correlations across treatment conditions revealed no differences in the correlation between the two familiar environments before or after controlling for multiple comparisons indicating no effect on drug on the stability of well-established highly correlated place fields in this model. The interaction between drug and environment was not significant for this parameter.

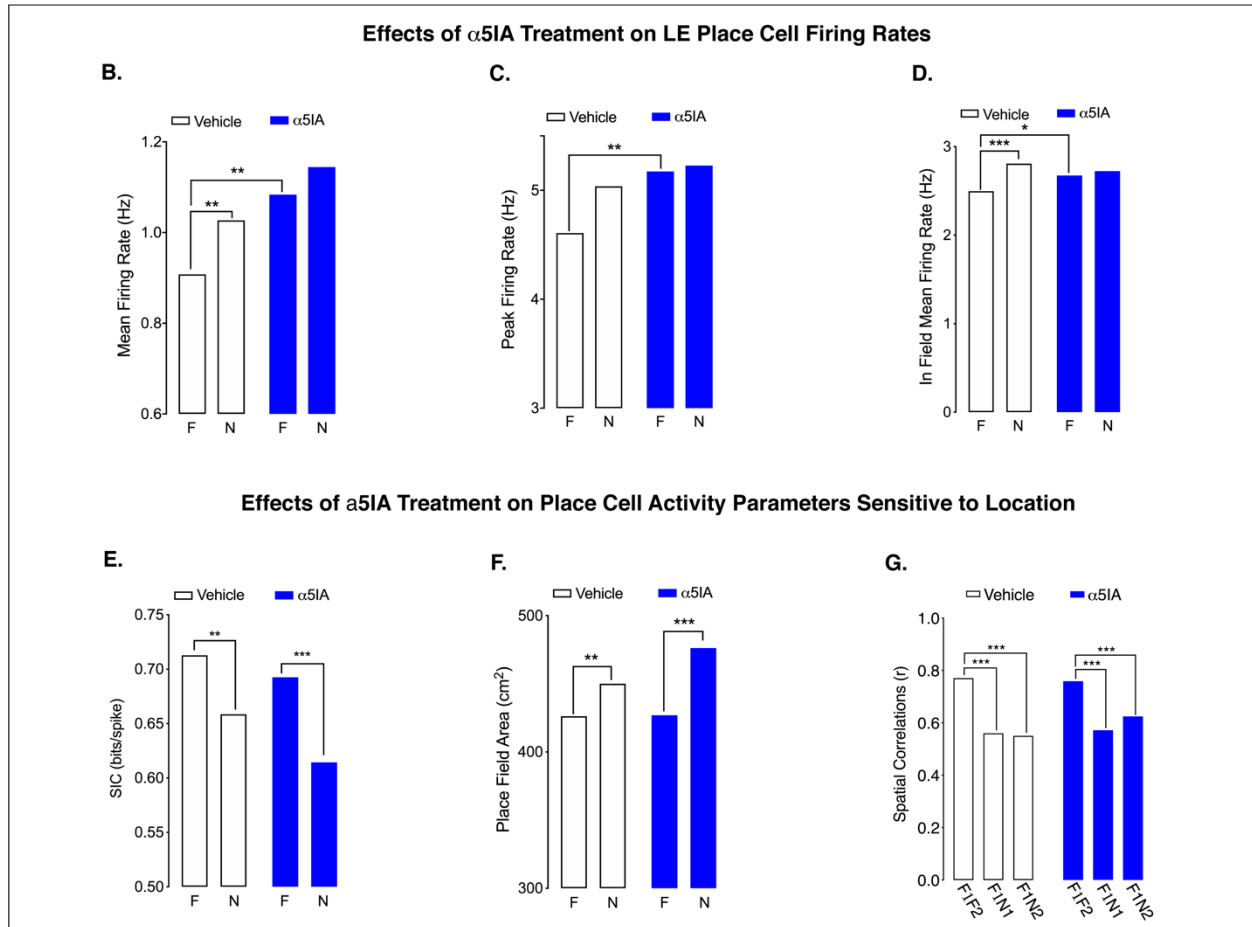

**Fig. S11. Results of remapping model experiments designed to assess the within-subject effects of oral  $\alpha 5IA$  administration on CA1 place cell responses to environmental novelty in adult male LE rats. A) Environment-dependent remapping model. A) Histogram shows significant effect of  $\alpha 5IA$  (1.0 mg/kg) on MFR of CA1 place cells in a familiar environment and significant effects of environmental novelty on MFR. B) Histogram showing significant effect of  $\alpha 5IA$  on PFR of place cells in a familiar environment. C) Histogram shows significant effect of  $\alpha 5IA$  on in-field MFR of CA1 place cells in a familiar environment and significant effects of environmental novelty on in-field MFR. D) SIC significantly decreases during exposure to environmental novelty. E) Planned comparisons indicate that PFA significantly increases following administration of  $\alpha 5IA$  but ANOVA reveals no interaction between environment and treatment on this parameter. F) Environmental novelty significantly reduces place field spatial correlations novelty in both treatment conditions. Rats  $n = 3$ . Place cells  $n = 115$ . Significant at  $*p < 0.01$  unless otherwise indicated.**

**Table S7: Means and SEMs for Remapping Data from LE Rats**

| Parameter                 | Mean | SEM         |
|---------------------------|------|-------------|
| MFR Familiar Vehicle      | 0.91 | $\pm 0.062$ |
| MFR Novel Vehicle         | 1.03 | $\pm 0.073$ |
| MFR Familiar $\alpha 5IA$ | 1.08 | $\pm 0.083$ |
| MFR Novel $\alpha 5IA$    | 1.14 | $\pm 0.093$ |
| PFR Familiar Vehicle      | 4.61 | $\pm 0.344$ |
| PFR Novel Vehicle         | 5.04 | $\pm 0.359$ |
| PFR Familiar $\alpha 5IA$ | 5.17 | $\pm 0.395$ |
| PFR Novel $\alpha 5IA$    | 5.23 | $\pm 0.338$ |

|                                    |      |             |
|------------------------------------|------|-------------|
| In Field MFR Familiar Vehicle      | 2.50 | $\pm 0.169$ |
| In Field MFR Novel Vehicle         | 2.67 | $\pm 0.150$ |
| In Field MFR Familiar $\alpha 5IA$ | 2.74 | $\pm 0.184$ |
| In Field MFR Novel $\alpha 5IA$    | 2.80 | $\pm 0.166$ |
| SIC Familiar Vehicle               | 0.71 | $\pm 0.046$ |
| SIC Novel Vehicle                  | 0.69 | $\pm 0.044$ |
| SIC Familiar $\alpha 5IA$          | 0.66 | $\pm 0.050$ |
| SIC Novel $\alpha 5IA$             | 0.61 | $\pm 0.041$ |
| Area Familiar Vehicle              | 426  | $\pm 14.81$ |
| Area Novel Vehicle                 | 450  | $\pm 18.50$ |
| Area Familiar $\alpha 5IA$         | 427  | $\pm 15.25$ |
| Area Novel $\alpha 5IA$            | 476  | $\pm 18.13$ |
| Correlation F1F4 Vehicle           | 0.77 | $\pm 0.013$ |
| Correlation F1N1 Vehicle           | 0.56 | $\pm 0.027$ |
| Correlation F1N2 Vehicle           | 0.55 | $\pm 0.027$ |
| Correlation F1F4 $\alpha 5IA$      | 0.75 | $\pm 0.014$ |
| Correlation F1N1 $\alpha 5IA$      | 0.57 | $\pm 0.023$ |
| Correlation NF1N2 $\alpha 5IA$     | 0.62 | $\pm 0.023$ |

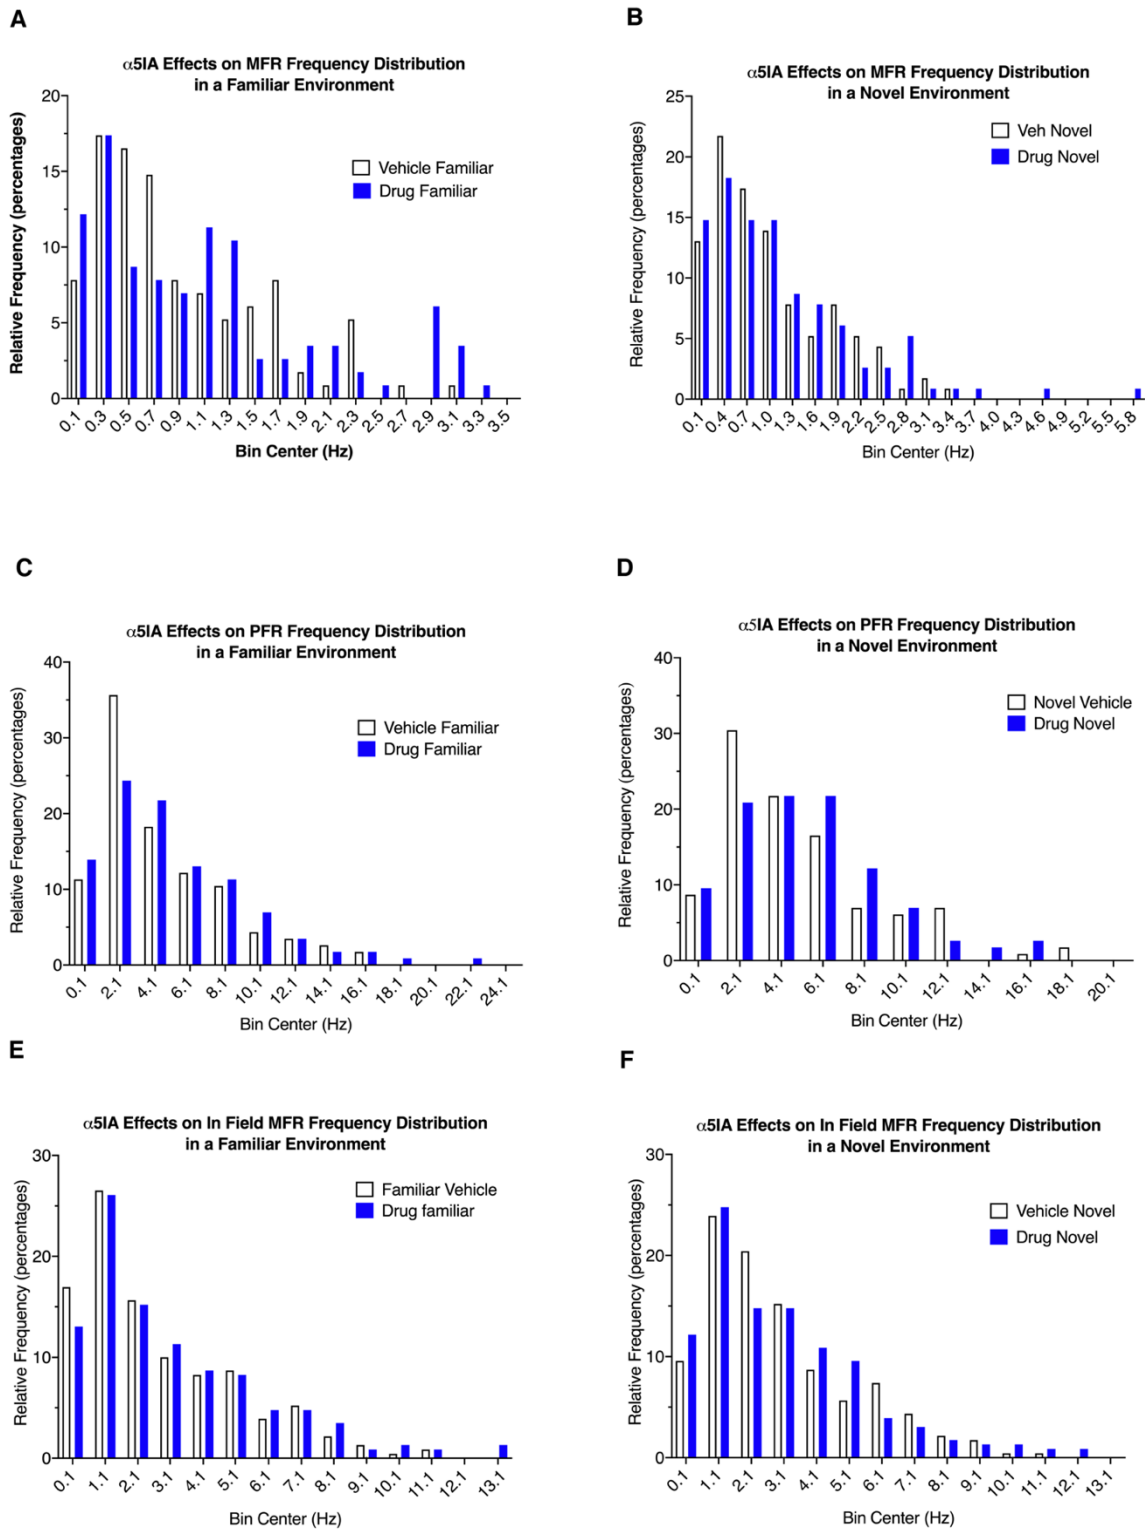

**Fig S12. Firing Rate Frequency Distributions Reveal Effects of  $\alpha$ 5IA on Mean and Peak Firing Rates in the Familiar and Novel Environments in LE rats.** A) The mean firing rate frequency distribution in the familiar environment reveals a shift in the distribution with a remarkable increase in the percentage of

cells with mean firing rates  $\geq 1.9$  Hz following  $\alpha 51A$  administration. **B)** Mean firing rate frequency distributions in the novel environment also reveals a shift in the frequency distribution with an increase in the percentage of cells with mean firing rates  $\geq 2.8$  Hz following  $\alpha 51A$  administration. **C)** Peak firing rate frequency distributions in the familiar environment also reveals a shift in the frequency distribution with an increase in the percentage of cells with peak firing rates  $\geq 4.1$  Hz following  $\alpha 51A$  administration. **D)** Peak firing rate frequency distributions in the novel environment also reveals a shift in the frequency distribution with an increase in the percentage of cells with peak firing rates  $\geq 6.1$  Hz following  $\alpha 51A$  administration. **E)** In-field mean firing rate frequency distributions in the familiar environment also reveals a shift in the frequency distribution with an increase in the percentage of cells with peak firing rates  $\geq 8.1$  Hz following  $\alpha 51A$  administration. **F)** In-field mean firing rate frequency distributions in the novel environment also reveals a shift in the frequency distribution with an increase in the percentage of cells with peak firing rates  $\geq 10.1$  Hz following  $\alpha 51A$ .

**Table S8. Summary of Significant Effects of Oral  $\alpha 51A$  on CA1 Place Cells in LE Rats**

| Parameter                 | Drug Familiar  | Drug Novel | Response to Novelty  | Drug/Env Interaction |
|---------------------------|----------------|------------|----------------------|----------------------|
| Mean FR (MFR)             | Yes $\uparrow$ | No         | Yes $\downarrow$     | No                   |
| Peak FR (PFR)             | Yes $\uparrow$ | No         | No                   | Trend                |
| In Field MFR              | Yes $\uparrow$ | No         | Yes $\downarrow$     | No                   |
| SIC                       | No             | No         | Trend                | No                   |
| PF Area (PFA)             | No             | No         | No                   | No                   |
| Spatial Correlations (SC) | No             | No         | Trend for F1:N1 only | No                   |

Significant effects indicated by yes or no at  $p < 0.05$ . Trends indicated at  $p < 0.1$

**Table S9. Results of Statistical Analysis of Place Cell and Ripple Response to Oral  $\alpha 51A$  in LE Rats**

| Figure # | Panel | Test statistic (DF) = p value<br>(Dependent Variable)                                                    | Significance of Pairwise Comparisons                                                                                                                                                                                                            |
|----------|-------|----------------------------------------------------------------------------------------------------------|-------------------------------------------------------------------------------------------------------------------------------------------------------------------------------------------------------------------------------------------------|
| Fig. 1.  | B     | <i>Friedman's ANOVA (<math>F(3, 86) = 7.24; p = 0.003</math>)<br/>(Escalating Dose Mean Firing Rate)</i> | Veh v. 0.3mg/kg; $p = 0.03^*$<br>Veh v. 1.0mg/kg; $p = 0.0002^{***}$<br>Veh v. 2.0mg/kg; $p = 0.001^{**}$                                                                                                                                       |
| Fig. 2.  | B     | <i>ANOVA (<math>F(3, 115) = 4.64; p = 0.002</math>)<br/>(Mean Firing Rate)</i>                           | Fam <sub>Veh</sub> v. Nov <sub>Veh</sub> ; $p = 0.01^{**}$<br>Fam <sub>Veh</sub> v. Fam <sub>DrG</sub> ; $p = 0.002^{**}$                                                                                                                       |
|          | C     | <i>Friedman's (<math>\chi^2(3, 115) = 21.91; p &lt; 0.001</math>)<br/>(Peak Mean Firing Rate)</i>        | Fam <sub>Veh</sub> v. Nov <sub>Veh</sub> ; $p = 0.05^\dagger$<br>Fam <sub>Veh</sub> v. Fam <sub>DrG</sub> ; $p = 0.002^{**}$                                                                                                                    |
|          | D     | <i>Friedman's (<math>\chi^2(3, 115) = 17.6; p &lt; 0.001</math>)<br/>(In-Field Mean Firing Rate)</i>     | Fam <sub>Veh</sub> v. Nov <sub>Veh</sub> ; $p < 0.001^{***}$<br>Fam <sub>Veh</sub> v. Fam <sub>DrG</sub> ; $p = 0.013^*$                                                                                                                        |
|          | E     | <i>Friedman's (<math>\chi^2(3, 115) = 25.9; p &lt; 0.001</math>)<br/>(Spatial Information Content)</i>   | Fam <sub>Veh</sub> v. Nov <sub>Veh</sub> ; $p < 0.006^{**}$<br>Fam <sub>DrG</sub> v. Nov <sub>DrG</sub> ; $p < 0.001^{***}$<br>Fam <sub>Veh</sub> v. Fam <sub>DrG</sub> ; $p = 0.959$<br>Nov <sub>Veh</sub> v. Nov <sub>DrG</sub> ; $p = 0.645$ |
|          | F     | <i>Friedman's (<math>\chi^2(3, 115) = 20.3; p &lt; 0.001</math>)</i>                                     | Fam <sub>Veh</sub> v. Nov <sub>Veh</sub> ; $p < 0.005^{**}$                                                                                                                                                                                     |

|          |   |                                                                                                        |                                                                                                                                                                                                                                                                                                                                                                                                                                                                                                                   |
|----------|---|--------------------------------------------------------------------------------------------------------|-------------------------------------------------------------------------------------------------------------------------------------------------------------------------------------------------------------------------------------------------------------------------------------------------------------------------------------------------------------------------------------------------------------------------------------------------------------------------------------------------------------------|
|          | G | (Place Field Area)<br><br>Friedman's ( $\chi^2(2, 77) = 63.3.0; p < 0.001$ )<br>(Spatial Correlations) | Fam <sub>Drg</sub> v. Nov <sub>Drg</sub> ; $p < 0.001^{***}$<br>Fam <sub>Veh</sub> v. Fam <sub>Drg</sub> ; $p = 0.867$<br>Nov <sub>Veh</sub> v. Nov <sub>Drg</sub> ; $p = 0.767$<br><br>Fam <sub>Veh</sub> v. Nov <sub>Veh1</sub> ; $p < 0.001^{***}$<br>Fam <sub>Veh</sub> v. Nov <sub>Veh2</sub> ; $p < 0.001^{***}$<br>Fam <sub>Drg</sub> v. Nov <sub>Drg1</sub> ; $p < 0.001^{***}$<br>Fam <sub>Drg</sub> v. Nov <sub>Drg1</sub> ; $p < 0.001^{***}$<br>Fam <sub>Veh</sub> v. Fam <sub>Drg</sub> ; $p = 0.86$ |
| Fig. S3. | B | ANOVA ( $F(3, 86) = 7.24; p = 0.003$ )<br>(Escalating Dose Mean Firing Rate)                           | Veh v. 1.0mg/kg; $p = 0.003^{**}$<br>Veh v. 2.0mg/kg; $p = 0.02^*$<br>1.0mg v. kg/3.0mg/kg; $p > 0.999$                                                                                                                                                                                                                                                                                                                                                                                                           |
| Fig. 4.  | E | Friedman's ( $\chi^2(4, 125) = 361; p < 0.001$ )<br>(Mean Power Spectral Density)                      | PSD <sub>Veh</sub> v. PSD <sub>0.3mg/kg</sub> ; $p < 0.001^{***}$<br>PSD <sub>Veh</sub> v. PSD <sub>1.0mg/kg</sub> ; $p < 0.001^{***}$<br>PSD <sub>Veh</sub> v. PSD <sub>3.0mg/kg</sub> ; $p < 0.001^{***}$                                                                                                                                                                                                                                                                                                       |
|          | F | Friedman's ( $\chi^2(1, 3) = 12; p = 0.007$ )<br>(Peak Power Spectral Density)5                        | PSD <sub>Veh</sub> v. PSD <sub>0.3mg/kg</sub> ; $p = 0.02^{\dagger}$<br>PSD <sub>Veh</sub> v. PSD <sub>1.0mg/kg</sub> ; $p = 0.007^{**}$<br>PSD <sub>Veh</sub> v. PSD <sub>3.0mg/kg</sub> ; $p = 0.273$                                                                                                                                                                                                                                                                                                           |
|          | H | Wilcoxon ( $\chi^2(1, 125) = 9.16; p < 0.001$ )<br>(Mean Power Spectral Density no Theta)              | PSD <sub>Veh</sub> v. PSD <sub>D</sub> ; $p < 0.001^{***}$                                                                                                                                                                                                                                                                                                                                                                                                                                                        |
|          | K | Friedman's ( $\chi^2(4, 125) = 312; p < 0.001$ )<br>(Mean Power Spectral Density)                      | PSD <sub>Veh</sub> v. PSD <sub>0.3mg/kg</sub> ; $p > 0.05$<br>PSD <sub>Veh</sub> v. PSD <sub>1.0mg/kg</sub> ; $p < 0.001^{***}$<br>PSD <sub>Veh</sub> v. PSD <sub>2.0mg/kg</sub> ; $p < 0.001^{***}$                                                                                                                                                                                                                                                                                                              |
|          | L | Friedman's ( $\chi^2(1, 3) = 13; p = 0.004$ )<br>(Peak Power Spectral Density)                         | PSD <sub>Veh</sub> v. PSD <sub>0.3mg/kg</sub> ; $p = 0.462$<br>PSD <sub>Veh</sub> v. PSD <sub>1.0mg/kg</sub> ; $p = 0.01^{**}$<br>PSD <sub>Veh</sub> v. PSD <sub>2.0mg/kg</sub> ; $p = 0.004^{**}$                                                                                                                                                                                                                                                                                                                |
|          | N | Wilcoxon ( $\chi^2(1, 125) = 22; p < 0.001$ )<br>(Mean Power Spectral Density no Theta)                | PSD <sub>Veh</sub> v. PSD <sub>D</sub> ; $p < 0.001^{***}$                                                                                                                                                                                                                                                                                                                                                                                                                                                        |
|          | O | Friedman's ( $\chi^2(3, 125) = 43; p < 0.001$ )<br>(Mean Power Spectral Density)                       | PSD <sub>Veh</sub> v. PSD <sub>0.3mg/kg</sub> ; $p = 0.462$<br>PSD <sub>Veh</sub> v. PSD <sub>1.0mg/kg</sub> ; $p < 0.001^{***}$<br>PSD <sub>Veh</sub> v. PSD <sub>2.0mg/kg</sub> ; $p < 0.001^{***}$                                                                                                                                                                                                                                                                                                             |
|          | Q | Friedman's ( $\chi^2(1, 3) = 11; p = 0.006$ )<br>(Peak Power Spectral Density)                         | PSD <sub>Veh</sub> v. PSD <sub>0.3mg/kg</sub> ; $p = 0.055^{\dagger}$<br>PSD <sub>Veh</sub> v. PSD <sub>1.0mg/kg</sub> ; $p = 0.17$<br>PSD <sub>Veh</sub> v. PSD <sub>2.0mg/kg</sub> ; $p = 0.006^{**}$                                                                                                                                                                                                                                                                                                           |
|          | R | Wilcoxon ( $\chi(1, 125) = 18; p < 0.001$ )<br>(Mean Power Spectral Density no Theta)                  | PSD <sub>Veh</sub> v. PSD <sub>D</sub> ; $p < 0.001^{***}$                                                                                                                                                                                                                                                                                                                                                                                                                                                        |
| Fig. 5.  | B | Kruskal-Wallis ( $H(3, 405) = 15; p < 0.0001$ )<br>(Ripple Peak Amplitude)                             | Amp <sub>Veh</sub> v. Amp <sub>0.3mg/kg</sub> ; $p < 0.001^{***}$<br>Amp <sub>Veh</sub> v. Amp <sub>1.0mg/kg</sub> ; $p < 0.001^{***}$<br>Amp <sub>Veh</sub> v. Amp <sub>2.0mg/kg</sub> ; $p < 0.001^{***}$                                                                                                                                                                                                                                                                                                       |

|   |                                                                            |                                                                                                                                                                                             |
|---|----------------------------------------------------------------------------|---------------------------------------------------------------------------------------------------------------------------------------------------------------------------------------------|
| C | ANOVA $F(3, 86) = 6.13; p = 0.018$<br>(Ripple Counts)                      | Number <sub>veh</sub> v. Number <sub>0.3mg/kg</sub> ; $p > 0.724$<br>Number <sub>veh</sub> v. Number <sub>1.0mg/kg</sub> ; $p = 0.022^*$                                                    |
| D | Kruskal-Wallis ( $H(3, 2066) = 11.9; p = 0.008$ )<br>(Ripple Duration)     | Dur <sub>veh</sub> v. Dur <sub>0.3mg/kg</sub> ; $p = 0.943$<br>Dur <sub>veh</sub> v. Dur <sub>1.0mg/kg</sub> ; $p = 0.003^*$<br>Dur <sub>veh</sub> v. Dur <sub>2.0mg/kg</sub> ; $p > 0.180$ |
| E | Kruskal-Wallis ( $\chi^2(3, 2066); p = 0.124$ )<br>(Ripple Peak Frequency) |                                                                                                                                                                                             |

Significant effects indicated by: \* at  $p < 0.05$ ; \*\* at  $p < 0.01$ ; and, \*\*\* at  $p < 0.001$ .  
Trends not significant after controlling for multiple comparisons indicated by †.

### Supplement Data for Place Cell Firing Analysis in F344 Adult Male Rats

We successfully recorded data from  $n = 152$  place cells in three F344 adult male rats. All data were analyzed using Friedman's non-parametric repeated measures ANOVA with alpha level adjusted for the number of multiple pairwise comparisons unless otherwise indicated.

Friedman's ANOVA for mean firing rate was significant ( $F(3, 152) = 51.7; p < 0.001$ ). Planned comparisons indicated that  $\alpha 5IA$  administration significantly increased MFRs by 18.5% in the familiar environment ( $p < 0.001$ ) (see Fig. 3A in manuscript and Table S10). Planned comparisons also revealed significant increases in MFR on exposure to environmental novelty in both the vehicle ( $p < 0.001$ ) and drug ( $p = 0.007$ ) conditions indicating an effect of environment on mean firing rates. These effects of drug and environment were all significant after adjusting the alpha for multiple comparisons. The interaction between drug and environment was not significant on this parameter.

Peak firing rates (PFR) also increased significantly following  $\alpha 5IA$  administration ( $\chi^2(3, 152) = 43.3; p < 0.001$ ). A planned comparison revealed a small but significant ( $p = 0.01$ ) 7% peak firing rate increase in the familiar environment following  $\alpha 5IA$  administration. (see Fig. 3B in manuscript and Table S10) Planned comparisons also revealed significant increases in PFR during exposure to environmental novelty in both the vehicle ( $p < 0.001$ ) and drug ( $p = 0.01$ ) conditions indicating an effect of environment on peak firing rates. The effect of environmental novelty on PFR in the drug condition remained significant after controlling for multiple comparisons. The interaction between drug and environment was not significant on this parameter.

Significant ( $\chi^2(3, 152) = 38.7; p < 0.001$ ) in-field MFRs changes are also seen in this model. (see Fig. 3C in manuscript and Table S10) Planned comparisons revealed a significant ( $p = 0.004$ ) 11% in-field MFR increase in the familiar environment following  $\alpha 5IA$  administration. Planned comparisons indicated that in-field MFRs also increased significantly in the novel environment under both the vehicle ( $p < 0.001$ ) and drug ( $p = 0.01$ ) conditions indicating an effect of environment on this parameter. The effect of novelty on this parameter in the drug condition was not significant after controlling for multiple comparisons. The interaction between drug and environment was not significant on this parameter.

Analysis of variance in CA1 place cell spatial information content (SIC) per spike in this model also revealed significant ( $\chi^2(3, 152) = 46.0; p < 0.001$ ) effects. (see Fig. 3D in manuscript and Table S10) Planned comparisons demonstrated a significant ( $p < 0.01$ ) decreases in SIC in the novel environment in the vehicle

and drug treatment conditions of 18% and 10% respectively. The interaction between drug and environment was not significant on this parameter.

Significant ( $\chi^2(3, 152) = 12.4; p < 0.006$ ) changes in place field area (PFA) were revealed by ANOVA as well. (see Fig. 3E in manuscript and Table S10) PFA increased with environmental novelty from 366cm<sup>2</sup> to 407cm<sup>2</sup> (11%) and 368cm<sup>2</sup> to 412 cm<sup>2</sup> (12%) in the vehicle and drug conditions respectively but, although there was a strong trend ( $p = 0.07$ ) observed in vehicle condition the increase in PFA only reached statistical significance ( $p = 0.001$ ) in the drug condition. The interaction between drug and environment was not significant on this parameter.

Analysis of variance also revealed significant differences in place field spatial correlations in the vehicle condition ( $\chi^2(2, 44) = 28.7; p < 0.001$ ). (see Fig. 3F in manuscript and Table S10) Pairwise comparisons indicated spatial correlations between first familiar and each of the two novels (F1N1:  $r = 0.5, p < 0.001$ ; F1N2:  $r = 0.48, p < 0.001$ ) were significantly lower than the correlations between the two familiars (F1F2:  $r = 0.66$ ) indicating remapping occurred during both exposures to the novel in the vehicle condition. This effect remained significant when controlling for multiple comparisons. Significant ( $\chi^2(4, 44) = 19.4; p < 0.001$ ) differences in spatial correlations were also revealed by ANOVA in the drug condition. Pairwise comparisons indicated spatial correlations between first familiar and each of the two novels (F1N1:  $r = 0.59, p < 0.002$ ; F1N2:  $r = 0.56, p < 0.001$ ) were significantly lower than the correlations between the two familiars (F1F2:  $r = 0.69$ ) indicating remapping occurred during both exposures to the novel in the drug condition as well. Comparisons of spatial correlations across treatment conditions revealed no differences in the correlation between the two familiar environments before ( $p=0.20$ ) or after controlling for multiple comparisons ( $p$ ;  $r_{veh} = 0.66 \pm 0.10$ ;  $r_{drug} = 0.69 \pm 0.11$ ) indicating no effect on drug on the stability of well-established highly correlated place fields in this model (37). The interaction between drug and environment was not significant for this parameter.

**Table S10. Means and SEMs for Remapping Data from WT F344s**

| Parameter                          | Mean (Hz) | SEM (Hz) |
|------------------------------------|-----------|----------|
| MFR Familiar Vehicle               | 0.74      | ± 0.047  |
| MFR Novel Vehicle                  | 0.90      | ± 0.057  |
| MFR Familiar $\alpha$ 5IA          | 0.88      | ± 0.053  |
| MFR Novel $\alpha$ 5IA             | 0.98      | ± 0.059  |
| PFR Familiar Vehicle               | 3.80      | ± 0.213  |
| PFR Novel Vehicle                  | 4.44      | ± 0.240  |
| PFR Familiar $\alpha$ 5IA          | 5.07      | ± 0.210  |
| PFR Novel $\alpha$ 5IA             | 4.86      | ± 0.222  |
| In Field MFR Familiar Vehicle      | 2.38      | ± 0.130  |
| In Field MFR Novel Vehicle         | 2.76      | ± 0.144  |
| In Field MFR Familiar $\alpha$ 5IA | 2.64      | ± 0.137  |
| In Field MFR Novel $\alpha$ 5IA    | 2.93      | ± 0.140  |
| SIC Familiar Vehicle               | 0.73      | ± 0.042  |
| SIC Novel Vehicle                  | 0.59      | ± 0.034  |
| SIC Familiar $\alpha$ 5IA          | 0.70      | ± 0.036  |
| SIC Novel $\alpha$ 5IA             | 0.60      | ± 0.033  |
| Area Familiar Vehicle              | 366       | ± 13.48  |
| Area Novel Vehicle                 | 408       | ± 20.25  |
| Area Familiar $\alpha$ 5IA         | 369       | ± 13.56  |
| Area Novel $\alpha$ 5IA            | 413       | ± 16.36  |
| Correlation F1F4 Vehicle           | 0.66      | ± 0.016  |



|                                |      |         |
|--------------------------------|------|---------|
| Correlation F1N1 Vehicle       | 0.50 | ± 0.025 |
| Correlation F1N2 Vehicle       | 0.48 | ± 0.028 |
| Correlation F1F4 $\alpha$ 5IA  | 0.69 | ± 0.016 |
| Correlation F1N1 $\alpha$ 5IA  | 0.60 | ± 0.022 |
| Correlation NF1N2 $\alpha$ 5IA | 0.56 | ± 0.027 |

### ***Supplemental Analysis for Cell by Cell Effects of Oral $\alpha$ 5IA on Activity of Individual LE CA1 Pyramidal Cell and Interneurons***

Results of the cell by cell analysis for the percentages of pyramidal neurons increasing versus decreasing MFRs was performed using data from the 4 LE rats included in this study. This analysis revealed that significantly ( $\chi^2 = 8.1$ ; DF = 2;  $p < 0.0174$ ; 45% (60/134) more of these pyramidal cells increased MFR by  $\geq 20\%$  in a familiar environment after  $\alpha$ 5IA administration; a finding consistent with the data from the escalating dose-response experiment (**Table S11 and Fig. S13**).

Chi square analysis of interneuron activity indicates a significantly ( $\chi^2 = 22.5$ ; DF = 1;  $p < 0.0001$ ) greater portion of cells 56% (19/34) increased their MFR by  $\geq 20\%$  following administration of  $\alpha$ 5IA, while only 18% (6/34) showed a decrease of this magnitude. The average MFR of these interneurons across all 4 environments following vehicle and  $\alpha$ 5IA administration were 12.2 and 16.2 Hz respectively. The results of a pair subject T-test was also significant ( $t(33) = 2.08$ ;  $p = 0.045$ ) demonstrating that  $\alpha$ 5IA administration modulates the activity of interneurons as well as pyramidal cells in the CA1 subregion.

Place cells were also characterized based on the percentage of cells that rate remapped following vehicle versus  $\alpha$ 5IA administration. The number of place cells that rate remapped in the vehicle and drug conditions were 31% (42/134) and 25% (33/134) respectively. The observed percentage of cells showing rate remapping in this model which used different shaped environments in the same room is consistent with previous reports (S4). Of the place cells that showed a  $\geq 20\%$  increase in overall mean firing rate following drug administration, 25% (15/60) also showed rate remapping based on a  $\geq 50\%$  change in their in-field mean firing rates. A slightly smaller percentage 21% (9/42) of the place cells that showed a decrease in overall mean firing rate with following  $\alpha$ 5IA administration also showed rate remapping in the drug condition. A similar percentage 21% (7/33) of the place cells that did not show a change of this magnitude in overall mean firing rate due to drug still showed rate remapping suggesting rate remapping does not require a drug-induced change in overall mean firing rate. A similar number of these place cells (vehicle = 11; drug = 10) showed global remapping based on a change in their spatial correlations as well as a change in their firing rates in the vehicle control and drug conditions respectively.

**Table S11. Cell by Cell Mean Firing Rate Responses of Pyramidal Cells and Interneurons to 1.0 mg/kg  $\alpha$ 5IA**

| Neuron type           | D +        | D -        | D0         | Local Network Changes<br>(% cells with new activity patterns) |
|-----------------------|------------|------------|------------|---------------------------------------------------------------|
| Pyramidal Cell (Pyr)  | 60 Pyr (+) | 41 Pyr (-) | 33 Pyr (0) | ( 60(+) + 41(-) ) = 75% (101/134) of pyramidal cells          |
| Interneurons (Int)    | 19 Int (+) | 6 Int (-)  | 9 Int (0)  | ( 19(+) + 6(-) ) = 73% (25/34) of interneurons                |
| Total Neurons (Units) | 79 Tot (+) | 47 Tot (-) | 42 Tot (0) | ( 79(+) + 47(-) ) = 75% (126/168) of total units              |

Pyramidal cells and interneurons showing net changes in overall mean firing rate in response to 1.0mg/kg  $\alpha$ 5IA. A neuron is judged to be excited by drug D+ if  $MFR(drug)-MFR(veh)/MFR(veh) \geq 1.2 MFR(veh)$ ; inhibited by drug D- if  $MFR(drug)-MFR(veh)/MFR(veh) \leq 0.8 MFR(veh)$ ; and, not responsive to drug D0 if  $MFR(drug)-MFR(veh)/MFR(veh) < 1.2 MFR(veh)$  or  $> 0.8 MFR(veh)$ .

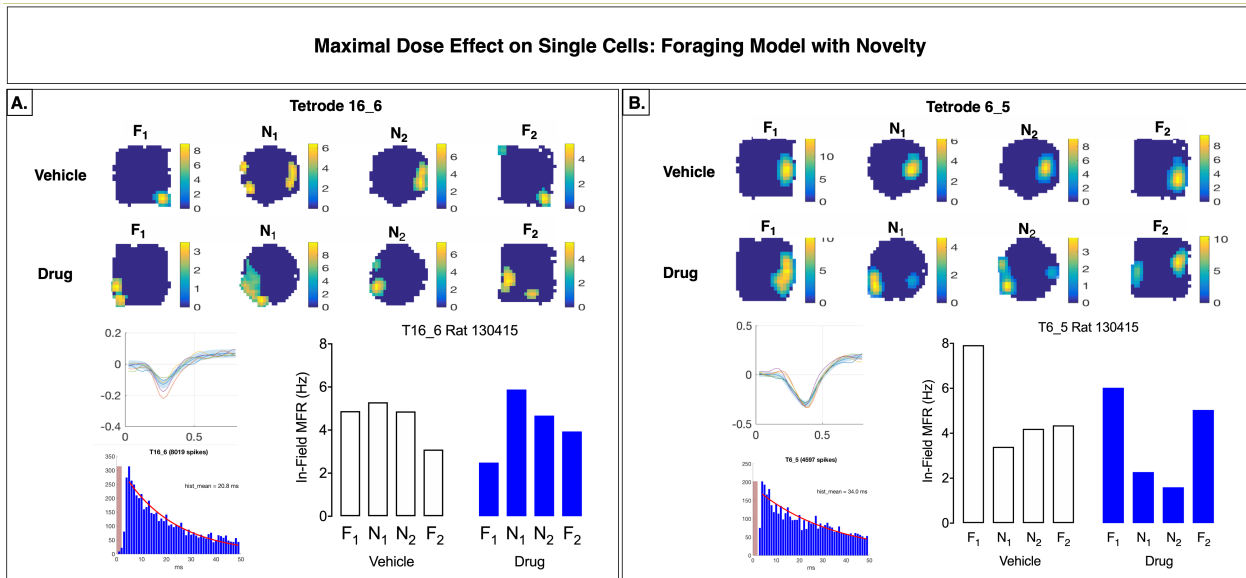

**Fig. S13. Representative place fields showing changes in spatial correlations before and after administration of  $\alpha$ 5IA in LE Rats. A)** CA1 neuron showing overt global remapping of place field heat maps across familiar (F) and novel (N) environments, following oral administration of vehicle (Top: F1-N1-N2-F2), without overt global remapping in the presence of  $\alpha$ 5IA (Bottom: F1-N1-N2-F2), but cell shows in field firing rate changes with both vehicle and drug (A, bottom middle panel). **B)** A different CA1 neuron showing stable place field heat maps across familiar (F) and novel (N) environments, following oral administration of vehicle (Top: F1-N1-N2-F2), demonstrates global remapping (Bottom: F1-N1-N2-F2) with a change in both location and firing rate (bottom middle panel) following administration of  $\alpha$ 5IA. The environments for CA1 neuron A and B were: F, square shape, black wood walls and epoxy wood floor, yellow vertical stripes; N1, hexagonal shape, black wood walls, epoxy wood floor, yellow vertical stripes; N2, cylindrical shape, silver metallic walls, black epoxy coated wood floor, yellow vertical stripes.

### Supplemental Results for Dose-Dependent Effects of $\alpha 51A$ on Ripples in F344 and TgF344-AD Rats

To control for systematic error, we performed additional experiments using vehicle only in the wakeful immobility model in two F344 male rats and one TgF344-AD rat age 11 mo. These experiments revealed that repeated exposure to a familiar environment, was consistently associated with a decrease in ripple band power and peak ripple amplitudes in both strains under vehicle control even when the number of ripple events increased (**Fig S14 and S14; Tables S12 and S13**).

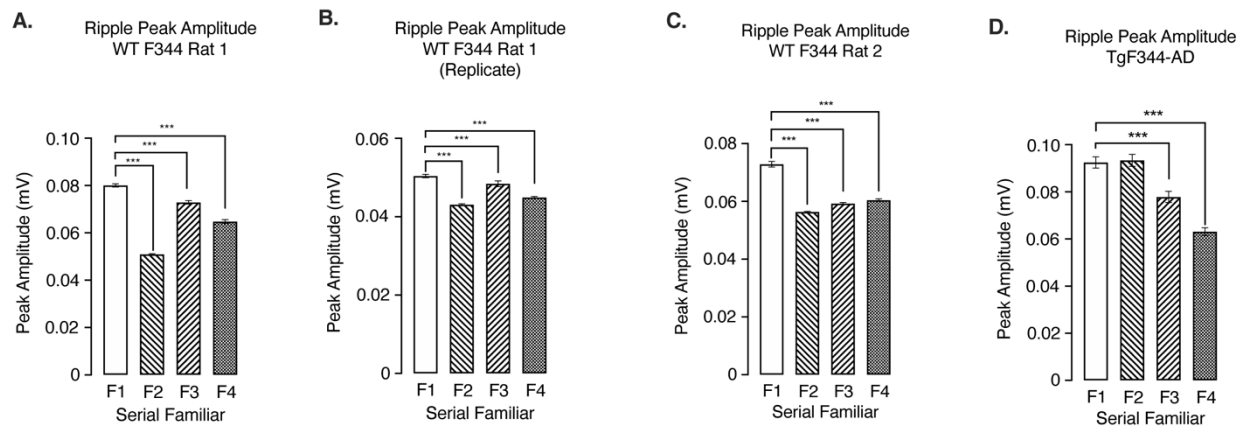

**Fig S14: Wakeful immobility model vehicle control experiments.** **A** Repeated exposure to a familiar environment is associated with significant decreases in peak ripple amplitude for subject 9. **B**) Results of replicate experiment in this same animal. **C**) Peak ripple amplitudes for subject 10. **D**) Peak ripple amplitudes for TgF344-AD (TgF344-AD subject 8). Significant effects indicated by: \*\*\* at p < 0.001.

**Table S12. F344 Vehicle Control Experiments Total Number of Ripples Per Session**

| Subject (Number)             | Vehicle | Vehicle   | Vehicle   | Vehicle   |
|------------------------------|---------|-----------|-----------|-----------|
| Subject 1 (F344 Rat #9)      | 502     | 579       | 430       | 409       |
| Subject 1 (F344 Rat #9)      | 463     | 605       | 435       | 608       |
| Subject 2 (F344 Rat #10)     | 320     | 648       | 558       | 508       |
| Subject 3 (Tg344-AD Rat #8)* | 579     | 564       | 472       | 508       |
| Average for all F344s        | 428     | 611       | 474       | 417       |
| Percent change F344s         | N/A     | 150%      | 118%      | 124%      |
| Statistical significance     | N/A     | p = 0.094 | p = 0.999 | P = 0.999 |

Total number ripple events per 10-minute recording session normalized by periods of immobility.

\* See Table S12

**Table S13. F344s and TgF344-AD Vehicle Control Experiments Total Number of Ripples Per Session**

| Subjects                    | Vehicle | Vehicle   | Vehicle   | Vehicle   |
|-----------------------------|---------|-----------|-----------|-----------|
| Average for all subjects    | 466     | 599       | 474       | 508       |
| Percent change all subjects | N/A     | 129%      | 102%      | 109%      |
| Statistical significance    | N/A     | p = 0.112 | p = 0.999 | P = 0.999 |

Total number ripple events per 10-minute recording session normalized by periods of immobility.

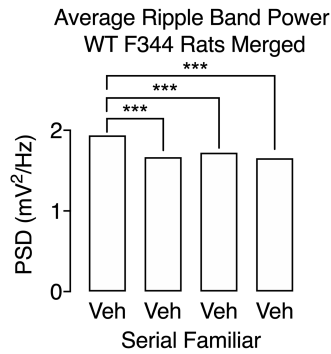

**Fig S15: Average Ripple Band Power F344 Vehicle Control Condition.** Within subject ANOVA reveals reduction in average ripple band power (140 to 200 Hz) in 11 mo old WT F344 male rats. Significant effects indicated by: \*\*\* at  $p < 0.001$ .

In addition, administration of single bolus doses of 1.0 mg/kg and 2.0 mg/kg of  $\alpha 51A$  immediately after vehicle to two of the F344 rats used in the escalating dose experiments and one of the rats used in the vehicle control experiments demonstrated that the increase in ripple band power induced by  $\alpha 51A$  administration are seen under these bolus dosing conditions as well. (**Fig. S16**)

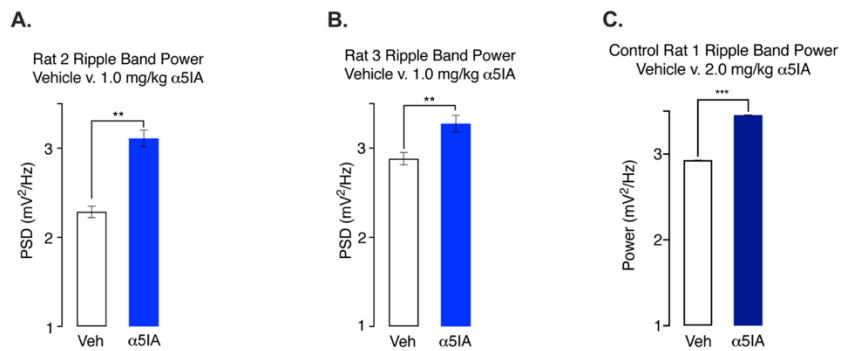

**Fig. S16. Increase in Ripple Band Power induced by single bolus dose of  $\alpha 51A$  (1.0mg/kg).** **A)** Single bolus dose of  $\alpha 51A$  (1.0 mg/kg) in F344 subject 2. **B)** Single bolus dose of  $\alpha 51A$  (1.0 mg/kg) in WT F344 subject 3. **C)** Single bolus dose of  $\alpha 51A$  (2.0 mg/kg) in WT F344 subject 1. All PSD values are  $\times 10^6$ . Significant effects indicated by: \*\* at  $p < 0.01$ ; and, \*\*\* at  $p < 0.001$ .

**Supplemental Results for Effects of  $\alpha$ 5IA on Ripple Band Power in Wildtype Rats**

**Table S14: 95% Confidence Intervals for  $\alpha$ 5IA Escalating Dose PSD Power in Ripple Band of WT Rats**

| Rat #1 (15 mo LE)      | Vehicle    | 0.3 mg/kg  | 1.0 mg/kg  | 2.0 mg/kg  |
|------------------------|------------|------------|------------|------------|
| Lower 95% CI           | 3.312e-006 | 3.974e-006 | 4.605e-006 | 4.000e-006 |
| Upper 95% CI           | 3.493e-006 | 4.217e-006 | 4.935e-006 | 4.240e-006 |
| Rat #2 (9 mo WT F344)  |            |            |            |            |
| Lower 95% CI           | 2.513e-006 | 2.661e-006 | 3.880e-006 | 3.732e-006 |
| Upper 95% CI           | 2.745e-006 | 2.932e-006 | 4.322e-006 | 4.199e-006 |
| Rat #3 (16 mo WT F344) |            |            |            |            |
| Lower 95% CI           | 2.237e-006 | 2.366e-006 | 2.514e-006 | 2.551e-006 |
| Upper 95% CI           | 2.330e-006 | 2.480e-006 | 2.638e-006 | 2.716e-006 |
| Rat #4 (12 mo WT F344) |            |            |            |            |
| Lower 95% CI           | 2.668e-006 | 2.668e-006 | 3.234e-006 | 2.723e-006 |
| Upper 95% CI           | 2.935e-006 | 2.925e-006 | 3.670e-006 | 3.030e-006 |

**1. Effects of  $\alpha$ 5IA on Total Number of Ripple Events per Session in WT Male Rats**

In all four wildtype (WT) animals tested (one LE and three F344) and all three TgF344-AD rats, treatment with oral  $\alpha$ 5IA increased the total number of ripples per session. Kruskal-Wallis ANOVA with planned comparisons revealed a significant increase in ripples per session of 49% ( $p = 0.022$ ) following administration of the 1.0 mg/kg oral dose of  $\alpha$ 5IA in WT rats (Table S14). This increase remained significant after controlling for multiple comparisons with an adjusted alpha level of 0.025. No significant effect of  $\alpha$ 5IA administration on average number of ripples per session is seen in the TgF344-AD rats (Table S15).

**Table S15. Oral  $\alpha$ 5IA Treatment Increases Total Number of Ripple events Per Session**

| Subject Number               | Vehicle | Oral Dose of $\alpha$ 5IA |                               |            |
|------------------------------|---------|---------------------------|-------------------------------|------------|
|                              |         | 0.3 mg/kg                 | 1.0 mg/kg                     | *2.0 mg/kg |
| Subject 1 (#LE-327396)       | 212     | 336                       | 346                           | 345        |
| Subject 2 (#F344-130)        | 178     | 178                       | 245                           | 265        |
| Subject 3 (#F344-600040)     | 123     | 191                       | 227                           | 224        |
| Subject 4 (#F344-113)        | 191     | 189                       | 236                           | 204        |
| Average for all WT subjects  | 176     | 223.5                     | 263.5                         | 259.5      |
| Change from vehicle baseline | N/A     | 27%                       | <b>50%</b>                    | 47%        |
| Statistical significance     | N/A     | $p = 0.724$               | <b><math>p = 0.022</math></b> | N/A†       |

Total number ripple events per 10-minute recording session normalized by periods of immobility

\*Highest dose administered to this LE male animal was 3.0 mg/kg. †Statistical significance not calculated due to dosing differences. Significance indicated at alpha = 0.025.

**Table S16. Oral  $\alpha$ 5IA Treatment Increases Total Number of Ripple events Per Session TgF344-AD Rats**

| Subject Number                     | Vehicle | Oral Dose of $\alpha$ 5IA |           |            |
|------------------------------------|---------|---------------------------|-----------|------------|
|                                    |         | 0.3 mg/kg                 | 1.0 mg/kg | *2.0 mg/kg |
| TgF344-AD Subject 1 (#128)         | 120     | 127                       | 142       | 119        |
| TgF344-AD Subject 2 (#126)         | 87      | 107                       | 140       | 144        |
| TgF344-AD Subject 3 (#115)         | 223     | 218                       | 242       | 248        |
| Average for all TgF344-AD subjects | 143     | 151                       | 175       | 170        |

|                                     |     |           |           |           |
|-------------------------------------|-----|-----------|-----------|-----------|
| <b>Change from vehicle baseline</b> | N/A | 6%        | 22%       | 19%       |
| <b>Statistical significance</b>     | N/A | p = 0.999 | p = 0.924 | p = 0.999 |

Total number ripple events per 10-minute recording session normalized by periods of immobility  
Significance indicated at alpha = 0.025.

## 2. *Effects of $\alpha$ 5IA on Peak Amplitude of Ripple in WT Rats*

Non-parametric analysis of variance of peak ripple amplitudes revealed significant drug-induced increases in all four wildtype animals tested (**Fig. S17**). For subject 1 (LE Rat: #327396), Kruskal-Wallis ANOVA test was significant ( $\chi^2$  (3, 104) = 24.8;  $p < 0.0001$ ), revealing dose-dependent increase in average peak amplitude of ripple events of 18% ( $p < 0.0001$ ) and 9% ( $p < 0.0001$ ) following administration of the 1.0 and 2.0 mg/kg doses of  $\alpha$ 5IA respectively. (**Fig. S17-A**). For subject 2 (WT F344 Rat: age 9 mo; #130), Kruskal-Wallis ANOVA revealed significant ( $\chi^2$  (3, 133) = 72.1;  $p < 0.0001$ ) dose-dependent increases in average peak amplitude of ripple events of 17% ( $p < 0.0001$ ), 28% ( $p < 0.0001$ ) and 34% ( $p < 0.0001$ ) following administration of the 0.3, 1.0 and 2.0 mg/kg doses of  $\alpha$ 5IA respectively in this rat (**Fig. S17-B**). The Kruskal-Wallis test of the peak ripple amplitude data from Subject 3 (WT F344 Rat: #600040) also revealed significant ( $\chi^2$  (3, 104) = 26.0;  $p < 0.0001$ ) dose-dependent increases in average peak amplitude of 14% ( $p < 0.0002$ ) and 22% ( $p < 0.0001$ ) following administration of the 1.0 and 2.0 mg/kg doses of  $\alpha$ 5IA respectively (**Fig. S17-C**). Kruskal-Wallis ANOVA of the ripple peak amplitudes from Subject 4 (WT F344 Rat: #113) was significant ( $\chi^2$  (3, 160) = 85.2;  $p < 0.0001$ ) as well, revealing dose dependent increases of 15% ( $p < 0.0001$ ), 31% ( $p < 0.0001$ ) and 20% ( $p < 0.0001$ ) following administration of the 0.3, 1.0 and 2.0 mg/kg doses of  $\alpha$ 5IA respectively in this animal (**Fig. S17-D**). A Kruskal-Wallis test with Dunn's correction for multiple comparisons of the merged peak amplitude data from all three WT F344 rats was also significant ( $\chi^2$  (3, 405) = 150;  $p < 0.0001$ ). Dose-dependent increases in average peak amplitude of ripple events of 11% ( $p < 0.0007$ ), 26% ( $p < 0.0001$ ) and 31% ( $p < 0.0001$ ) are seen following administration of the 0.3, 1.0 and 2.0 mg/kg doses of  $\alpha$ 5IA respectively (**Fig. S17-E**). The Kruskal-Wallis test of the merged peak amplitude data from all four rats was also significant ( $\chi^2$  (2, 509) = 41;  $p < 0.0001$ ). Planned comparisons revealed dose-dependent increases in average ripple peak amplitude of 10% ( $p < 0.033$ ) and 24% ( $p < 0.0001$ ) following administration of the 0.3 and 1.0 mg/kg doses respectively (**Fig. S17-F**). However, the effect on peak amplitude observed at 0.3 mg/kg dose was not significant when controlling for multiple comparisons.

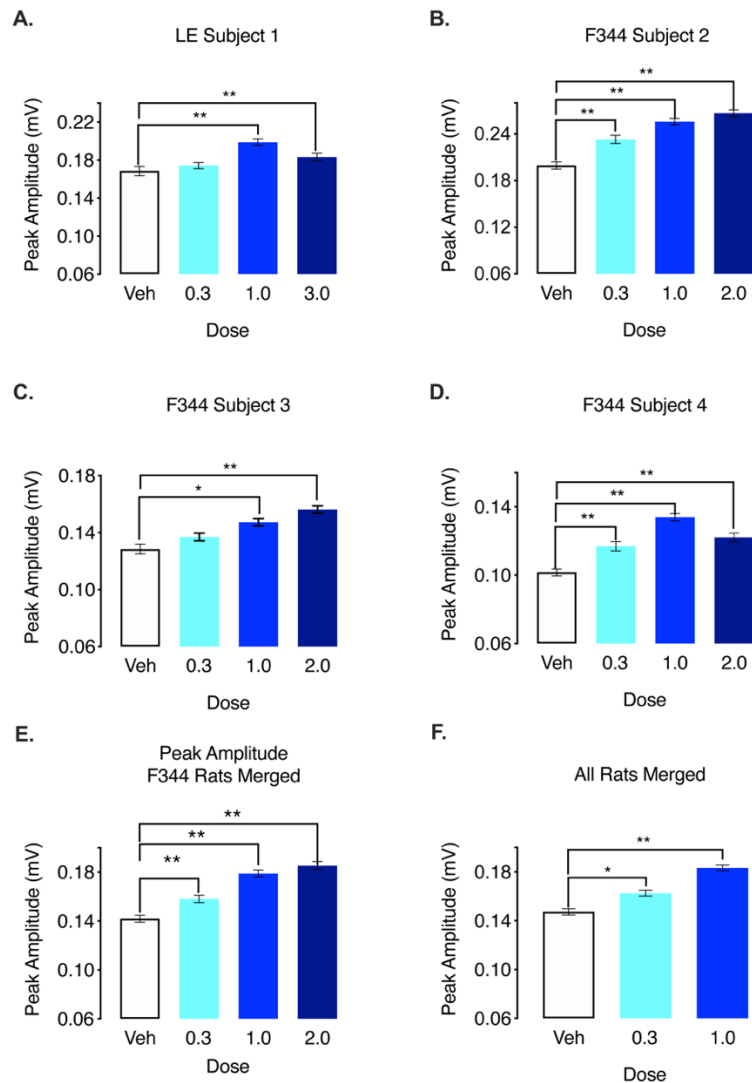

**Fig. S17.** Oral treatment with  $\alpha$ 5IA dose-dependently increases peak amplitude of ripples in adult WT male rats. **A)** Histogram of Kruskal-Wallis ANOVA results for LE Subject 1 showing significant dose-dependent increases in average peak amplitude of ripple events following administration of 1.0 and 2.0 mg/kg doses of  $\alpha$ 5IA. **B)** Histogram for F344 Subject 2 showing significant dose-dependent increases in average peak amplitude of ripple events at all three doses of  $\alpha$ 5IA tested. **C)** Histogram for F344 Subject 3 showing significant dose-dependent increases in average peak amplitude of ripple events following administration of 1.0 and 2.0 mg/kg doses of  $\alpha$ 5IA. **D)** Histogram for F344 Subject 4 showing significant dose-dependent increases in average peak amplitude of ripple events following administration of  $\alpha$ 5IA. **E)** Histogram showing average peak amplitude of ripples from all three F344 rats demonstrates significant dose dependent increases of 15% (0.3 mg/kg), 31% (1.0 mg/kg), and 20% (2.0 mg/kg). **F)** Histogram showing average peak amplitude of ripples from all four rats tested demonstrates significant dose dependent increases of 15% (0.3 mg/kg), 31% (1.0 mg/kg), and 20% (2.0 mg/kg). Significance indicated by \* at  $p < 0.05$  and \*\* at  $p < 0.01$ .

### 3. Effects of $\alpha$ 5IA on Ripple Duration in Wildtype Rats

Kruskal-Wallis ANOVA revealed no consistent significant within subject effects of drug on ripple duration. Subject 1 (LE Rat; age 15 mo; #327396; showed no significant drug induced effects on ripple duration ( $\chi^2(3, 104) = 1.0$ ;  $p = 0.78$ ). (**Fig. S18-A**) For Subject 2 (WT F344 Rat; age 9 mo; #130) the Kruskal-Wallis test

was significant ( $\chi^2(3, 104) = 8.5$ ;  $p = 0.036$ ), but the pairwise comparisons of each dose with vehicle did not reveal any significant changes in ripple duration. (**Fig. S18-B**) A significant effect of drug on ripple duration is observed following administration of 1.0 mg/kg  $\alpha 5IA$  in Subject 3 (WT F344 Rat age 16 mo: #600040; ( $\chi^2(3, 104) = 3.9$ ;  $p = 0.002$ ). (**Fig. S18-C**) A significant effect of drug on ripple duration is observed in Subject 4 (WT F344 Rat age 12 mo: #113;  $\chi^2(3, 160) = 4.4$ ;  $p = 0.04$ ) on a planned comparison at the 0.3 mg/kg dose but this was not after controlling for multiple comparisons ( $\chi^2(3, 160) = 4.4$ ;  $p = 0.07$ ). (**Fig. S18-D**). Despite the lack of any consistent within subject changes in ripple duration, the Kruskal-Wallis test of average merged ripple duration data from all three F344 rats revealed a small but significant ( $\chi^2(3, 405) = 10.4$ ;  $p = 0.04$ ) 11% decrease following administration of the 1.0 mg/kg dose of  $\alpha 5IA$ . (**Fig. S18-E**) A significant ( $\chi^2(3, 509) = 10.4$ ;  $p = 0.018$ ) decrease in ripple duration of 10% is also seen when the data from all for four animals including Subject 1 (LE Rat age 15 mo: # 327396) are merged prior to analysis (**Fig. S18-F**).

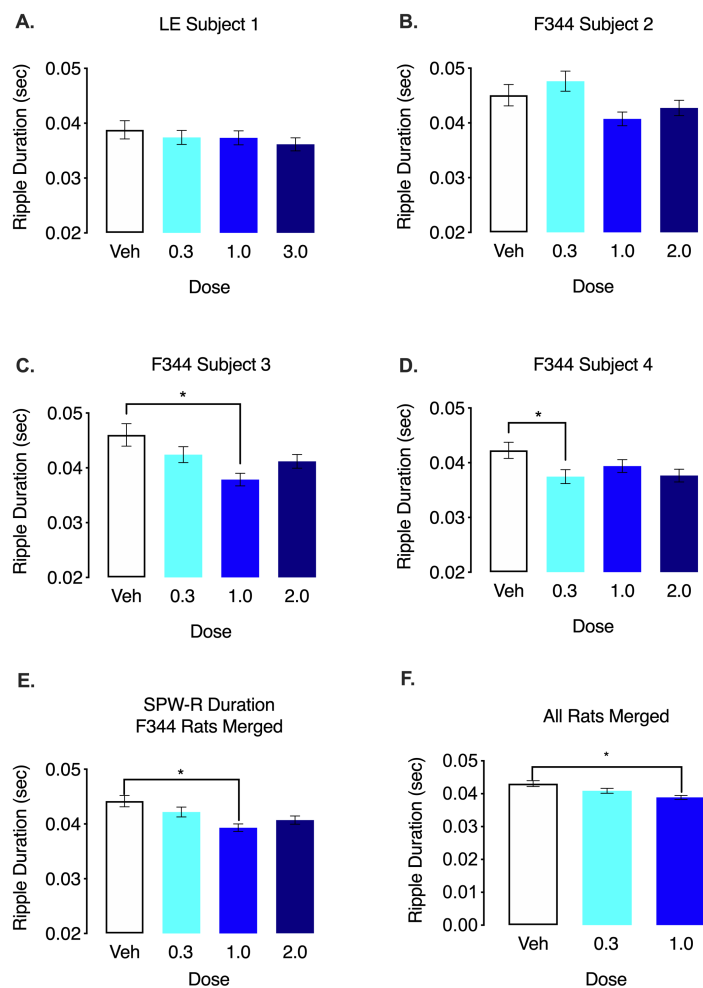

**Fig. S18.** Oral treatment of adult WT rats with 1.0 mg/kg  $\alpha 5IA$  decreases the average duration of ripple events. **A)** Subject 1 (LE Rat #600040) shows no significant dose-dependent changes in average ripple duration following administration of  $\alpha 5IA$ . **B)** Subject 2 (F344 Rat #130) shows no significant changes in average ripple duration. **C)** Subject 3 (F344 Rat #600040) shows a significant decrease in ripple duration following 1.0 mg/kg  $\alpha 5IA$ . **D)** Subject 4 (F344 Rat #113) shows a significant decrease in average ripple duration following administration of 0.3mg/kg  $\alpha 5IA$ . **E)** Merged data from all three F344 rats reveals a significant decrease in ripple duration following administration of



1.0 mg/kg dose of  $\alpha$ 5IA. **F)** A significant 10% decrease in ripple duration is seen following administration of 1.0 mg/kg dose of  $\alpha$ 5IA in the merged data from all 4 wildtype rats. Significance indicated by \* at  $p < 0.05$ .

#### 4. Effects of $\alpha$ 5IA on Peak Frequency of Ripples in Wildtype Rats

No significant dose-dependent changes in peak ripple frequency are observed following treatment of wildtype rats with  $\alpha$ 5IA (**Data not shown**).

#### 5. Supplemental Results for Effects of $\alpha$ 5IA on Ripple Band Power in TgF344-AD Rats

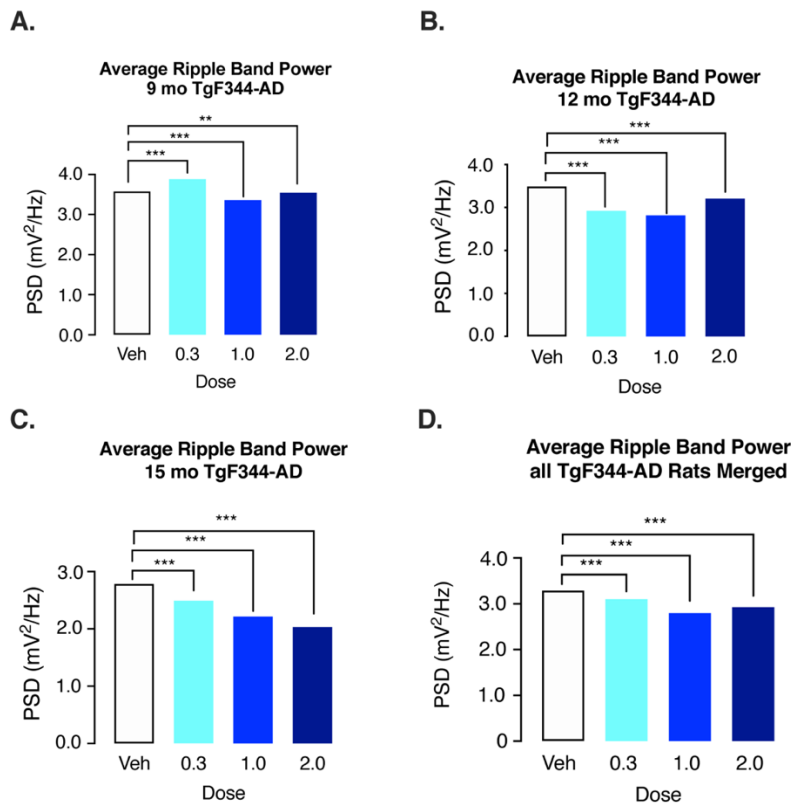

**Fig S19:** Treatment of adult TgF344-AD rats with  $\alpha$ 5IA decrease average power in ripple band. **A)** Data from 9 mo TgF344-AD shows increase at 0.3 mg but a decrease in average ripple band power following 1.0 and 2.0 mg/kg  $\alpha$ 5IA. **B)** Analysis of ripple band power in 12 mo TgF344-AD shows significant decrease in ripple band power following all 3 doses of  $\alpha$ 5IA. **C)** Analysis of ripple band power in 15 mo TgF344-AD shows significant decrease in ripple band power following all 3 doses of  $\alpha$ 5IA. **D)** Merged data from all three F344 rats reveals a significant decrease in ripple band power following administration of all three doses of dose of  $\alpha$ 5IA. Significance indicated by \*\*\* at  $p < 0.001$ .
